# Supplementary material
Source: PubMed Central journal article supplement (PMC5581701)
Supplement: NIHMS891112-supplement-1.pdf [file NIHMS891112-supplement-1.pdf]

## **Supplemental Information**

**Targeting histone demethylases in MYC-driven neuroblastomas with ciclopirox**

| Target    | Non-MNA cell lines |         |        | MNA cell lines |         |       |       |       |         | Hits (viability) |          | Correlation with MYCN |         |
|-----------|--------------------|---------|--------|----------------|---------|-------|-------|-------|---------|------------------|----------|-----------------------|---------|
|           | SK-N-SH            | SK-N-AS | CHLA20 | NB-1643        | BE(2)-C | NB7   | NB15  | Nagai | NB-1691 | Reduce           | Increase | R                     | p value |
| C14orf169 | -0.23              | -0.15   | -0.03  | -0.20          | -0.13   | -0.13 | -0.24 | -0.21 | -0.38   | 4                | 0        | 0.286                 | 0.0069  |
| HIF1AN    | -0.14              | -0.23   | 0.03   | -0.11          | 0.06    | -0.30 | -0.30 | -0.17 | -0.18   | 3                | 0        | -0.113                | 0.3     |
| HR        | -0.27              | 0.03    | -0.01  | -0.33          | -0.12   | -0.26 | 0.03  | -0.12 | -0.26   | 4                | 0        | 0.102                 | 0.35    |
| HSPBAP1   | -0.32              | -0.49   | 0.18   | -0.26          | -0.11   | -0.07 | 0.15  | -0.31 | -0.21   | 5                | 0        | 0.132                 | 0.22    |
| JARID2    | -0.28              | -0.12   | 0.03   | -0.07          | -0.13   | -0.14 | -0.02 | -0.29 | -0.26   | 3                | 0        | -0.045                | 0.68    |
| JHDM1D    | -0.22              | 0.04    | 0.09   | -0.07          | -0.09   | 0.02  | 0.11  | -0.16 | -0.04   | 1                | 0        | -0.141                | 0.19    |
| JMJD1C    | -0.06              | 0.28    | 0.12   | -0.02          | 0.36    | 0.15  | 0.10  | -0.11 | -0.10   | 2                | 0        | 0.195                 | 0.07    |
| JMJD4     | -0.19              | -0.18   | 0.08   | 0.01           | -0.16   | 0.16  | 0.19  | -0.22 | -0.04   | 1                | 0        | 0.224                 | 0.02    |
| JMJD6     | -0.15              | -0.29   | 0.29   | 0.01           | -0.47   | -0.52 | -0.57 | -0.27 | -0.20   | 6                | 1        | 0.274                 | 0.0099  |
| JMJD7     | -0.18              | -0.03   | 0.01   | -0.07          | -0.03   | -0.11 | -0.18 | -0.20 | -0.07   | 0                | 0        | -0.198                | 0.06    |
| JMJD8     | -0.15              | 0.27    | 0.29   | -0.14          | 0.11    | 0.02  | 0.01  | -0.02 | -0.01   | 1                | 1        | 0.281                 | 0.0081  |
| KDM1A     | -0.10              | -0.22   | 0.12   | -0.21          | 0.01    | -0.50 | -0.04 | 0.05  | -0.12   | 3                | 0        | -0.034                | 0.75    |
| KDM1B     | -0.18              | 0.26    | 0.14   | -0.10          | -0.02   | -0.01 | -0.23 | -0.04 | -0.07   | 1                | 1        | -0.028                | 0.79    |
| KDM2A     | 0.06               | 0.07    | 0.27   | 0.03           | 0.12    | -0.25 | -0.01 | -0.24 | -0.12   | 2                | 1        | -0.021                | 0.85    |
| KDM2B     | -0.43              | -0.37   | -0.21  | -0.14          | -0.17   | -0.09 | -0.02 | -0.28 | -0.30   | 5                | 0        | 0.216                 | 0.04    |
| KDM3A     | -0.11              | -0.23   | 0.06   | -0.10          | 0.29    | 0.06  | 0.36  | -0.08 | -0.05   | 1                | 2        | 0.315                 | 0.0028  |
| KDM3B     | 0.11               | -0.37   | 0.34   | 0.06           | -0.49   | -0.62 | -0.06 | -0.12 | -0.16   | 3                | 1        | -0.01                 | 0.92    |
| KDM4A     | -0.10              | -0.16   | 0.08   | -0.17          | -0.01   | -0.56 | -0.27 | -0.15 | -0.18   | 2                | 0        | -0.217                | 0.04    |
| KDM4B     | -0.27              | 0.02    | 0.06   | -0.21          | -0.24   | -0.32 | -0.30 | -0.28 | -0.32   | 7                | 0        | 0.385                 | 0.00021 |
| KDM4C     | -0.01              | -0.16   | 0.09   | -0.17          | 0.12    | 0.11  | 0.20  | -0.13 | -0.16   | 0                | 1        | -0.312                | 0.0031  |
| KDM4D     | -0.30              | -0.44   | 0.11   | -0.07          | -0.26   | -0.35 | -0.16 | -0.12 | -0.33   | 5                | 0        | 0.249                 | 0.02    |
| KDM4E     | -0.45              | -0.41   | -0.03  | -0.28          | -0.10   | -0.36 | -0.41 | -0.22 | -0.36   | 7                | 0        | N/A                   | N/A     |
| KDM5A     | -0.13              | -0.19   | -0.03  | -0.17          | -0.33   | -0.19 | 0.06  | -0.19 | -0.18   | 1                | 0        | 0.171                 | 0.11    |
| KDM5B     | -0.31              | -0.14   | 0.06   | -0.22          | 0.00    | -0.14 | -0.02 | -0.10 | -0.21   | 3                | 0        | 0.357                 | 0.00064 |
| KDM5C     | -0.15              | -0.51   | -0.06  | -0.18          | 0.00    | -0.43 | -0.13 | -0.23 | -0.41   | 4                | 0        | 0.299                 | 0.0047  |
| KDM5D     | -0.12              | -0.19   | 0.10   | -0.14          | -0.11   | -0.17 | 0.06  | -0.28 | -0.01   | 1                | 0        | 0.011                 | 0.92    |
| KDM6A     | 0.14               | 0.25    | 0.14   | -0.04          | -0.32   | 0.06  | -0.12 | -0.11 | -0.17   | 1                | 1        | 0.07                  | 0.52    |
| KDM6B     | -0.52              | -0.34   | -0.06  | -0.18          | -0.18   | -0.30 | -0.31 | -0.23 | -0.15   | 5                | 0        | 0.231                 | 0.03    |
| KDM8      | -0.35              | 0.06    | 0.11   | 0.01           | -0.09   | -0.24 | -0.17 | -0.19 | -0.19   | 2                | 0        | 0.146                 | 0.17    |
| MINA      | -0.04              | -0.18   | 0.20   | -0.23          | 0.16    | -0.05 | 0.04  | -0.03 | -0.11   | 1                | 1        | 0.193                 | 0.07    |
| PHF2      | -0.23              | -0.35   | 0.09   | -0.13          | 0.02    | -0.30 | -0.24 | -0.24 | -0.05   | 5                | 0        | 0.129                 | 0.23    |
| PHF8      | 0.09               | 0.09    | 0.21   | -0.08          | -0.12   | 0.02  | -0.28 | -0.23 | -0.08   | 2                | 1        | 0.173                 | 0.11    |
| TYW5      | -0.13              | 0.08    | 0.10   | 0.01           | -0.08   | -0.09 | -0.02 | -0.25 | -0.22   | 2                | 0        | 0.061                 | 0.57    |
| UTY       | -0.13              | 0.22    | 0.21   | -0.21          | -0.03   | -0.21 | -0.05 | -0.26 | -0.17   | 3                | 2        | 0.043                 | 0.69    |

**Figure S1. siRNA screening in neuroblastoma cells.**

Cell viability assessment after siRNA knockdown of histone demethylases and genes encoding MjC domain containing non-histone demethylase proteins. The first nine columns represent the value of each gene subtracted by 1 after being normalized to the control. The viability threshold is set to (+0.2, -0.2). A value of less than -0.2 defined the genes that reduced cell viability. A value of greater than 0.2 defined the genes that increased cell viability. MNA = MYCN amplification. The green rows indicate siRNA knockdown reduced proliferation in at least 4 cell lines. HR and HSPBAP1, two genes without histone demethylase activity were highlighted in the grey rows.

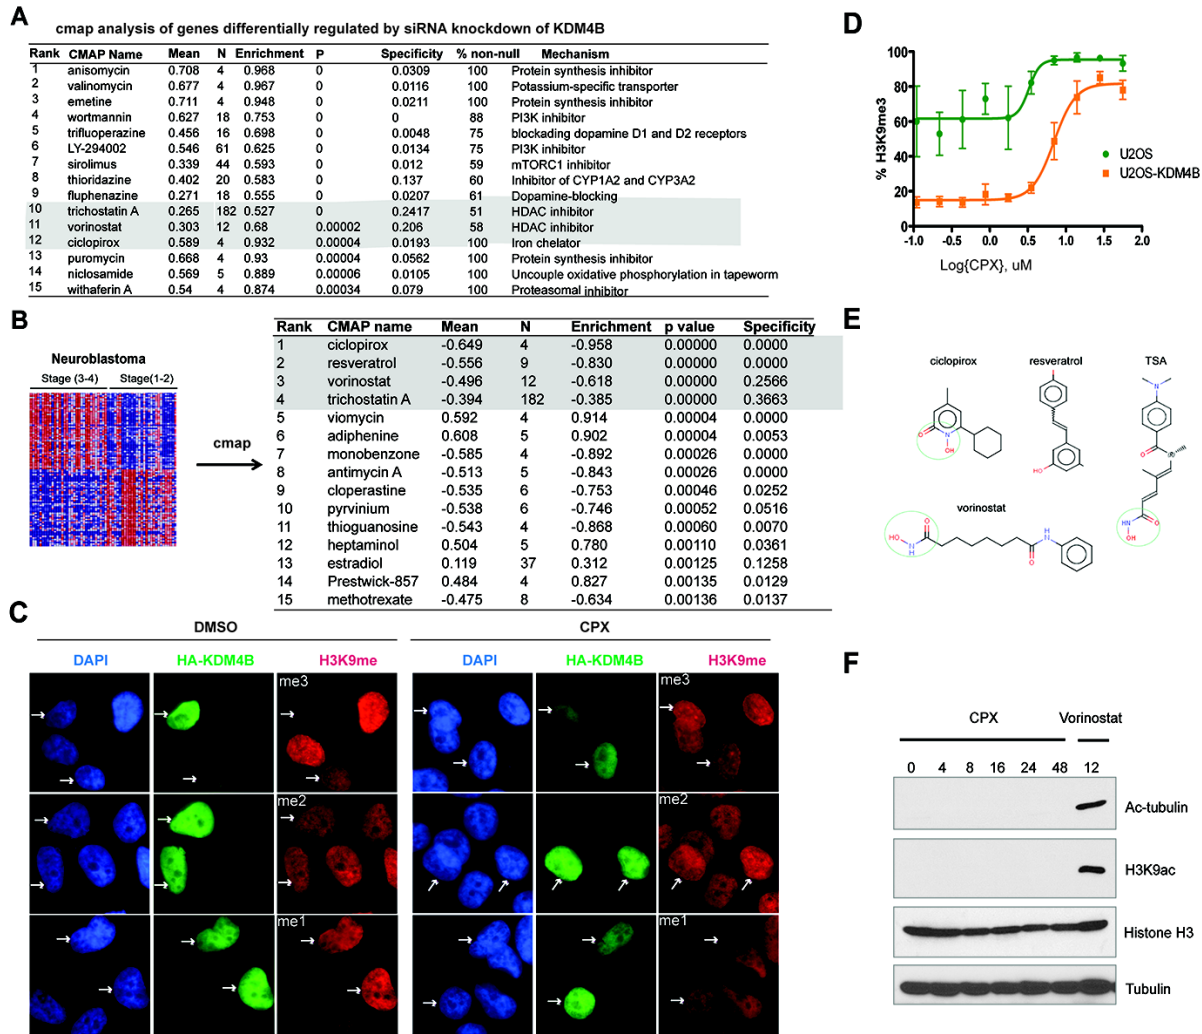

**Figure S2. Identification of ciclopirox that targets KDM4B**

(A) CMAP analysis to identify small molecules that generate a transcriptome inversely matching the KDM4B knockdown. The rank, name, mean connectivity score, the number of instances (n), enrichment of those instances in the order list of all instances, a permutation p-value for that enrichment score (P), the specificity of that enrichment (specificity), and the non-null percentage are shown in the table. (B) A similar strategy was used to identify small molecules that generate a transcriptome inversely matching the advanced neuroblastoma signature. The neuroblastoma gene expression profile (GSE12460, Janoueix-Lerosey et al) was reanalyzed according to INSS stage.

The top differential genes were used to perform CMAP. **(C)** Immunofluorescence shows a global change of H3K9me3/me2/me1 marks after overexpression of HA-tagged KDM4B in SK-N-AS cells (left). 5.0  $\mu$ M of CPX treatment for 48 hours blocked erasure of H3K9me3 by HA-KDM4B (right). Arrows indicate the cells overexpressing HA-KDM4B. **(D)** U2OS parental and U2OS-KDM4B were treated with different concentrations of CPX. Positive H3K9me3 cells were quantified by immunofluorescence. **(E)** Structures of CPX and HDAC inhibitors. **(F)** NB-1691 cells were treated with 5 $\mu$ M of CPX and 2.5 $\mu$ M of vorinostat for the indicated duration. Western blotting was used to assess acetylated tubulin and histone H3.

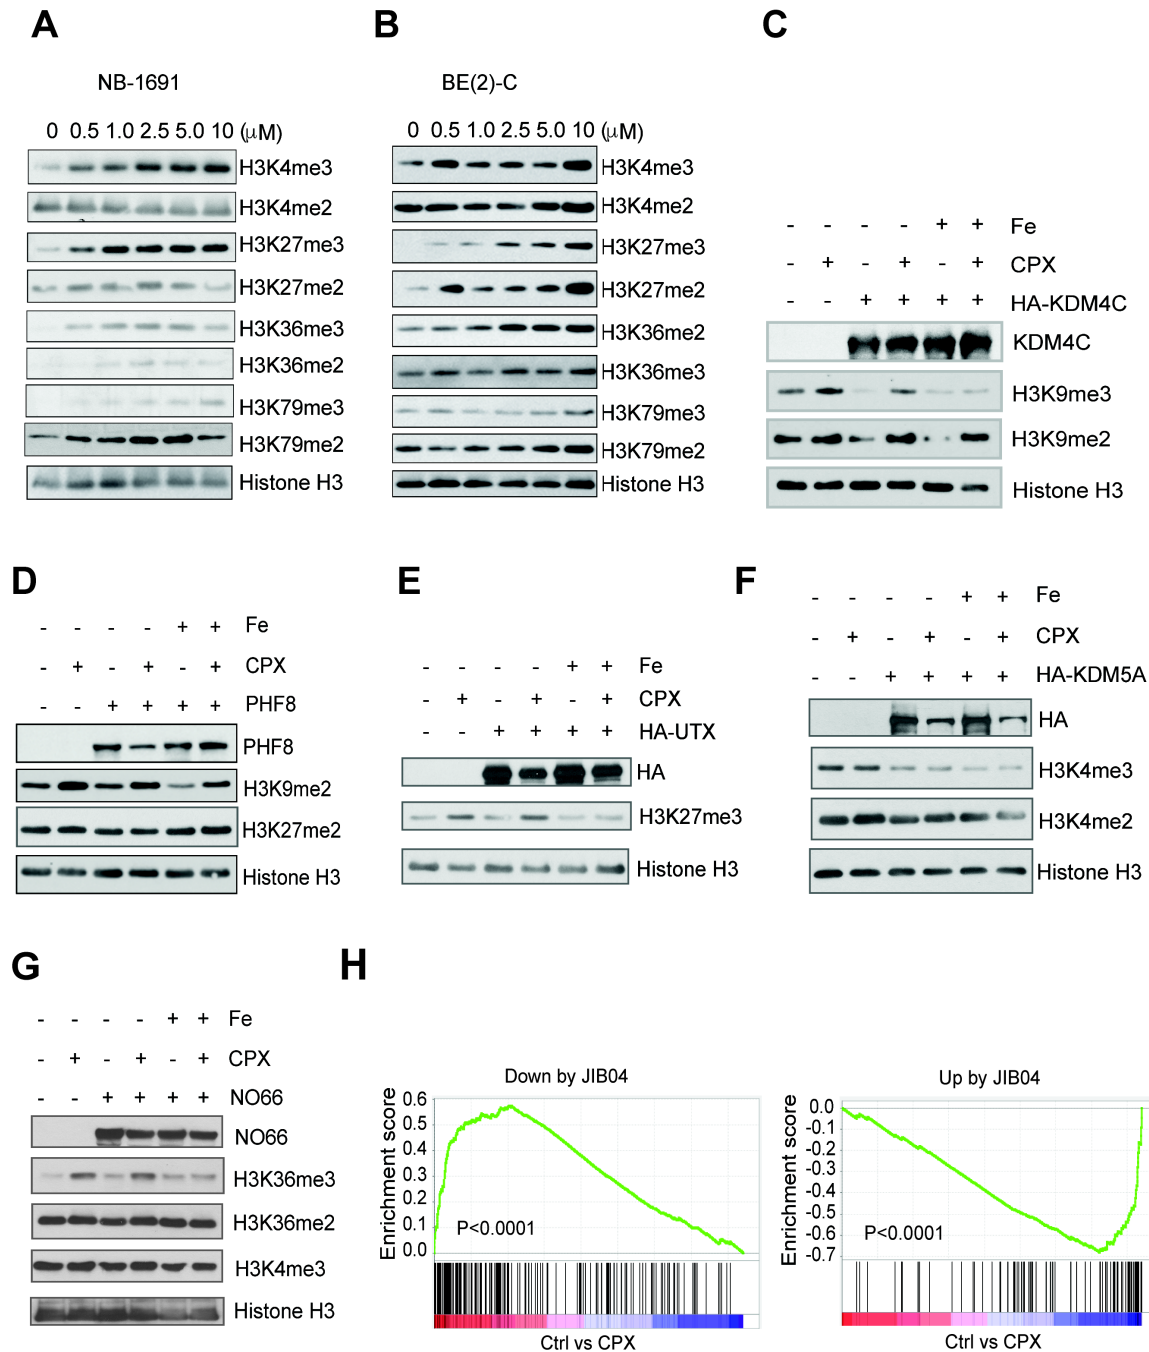

**Figure S3. CPX effect on other histone methyl marks**

(A-B) Different concentrations of CPX were used to treat NB-1691 and BE(2)-C cells for 48 hours. Whole cell lysates from samples as shown in Figure 2B were subject to western blotting with indicated antibodies. (C-G) 293T cells were transfected with expression constructs for the indicated

histone demethylases. 8 hours after transfection, cells were treated with 5.0  $\mu$ M of CPX and/or 500 $\mu$ g/ml of holo-transferrin that carries iron into cells, for 24 hours. Western blotting was used to assess the indicated markers. (H) CPX induces a similar expression profile as JIB-04. GSEA analysis of the JIB-04 signatures (downregulated and upregulated) with the CPX expression profile.

**A**

GSEA for enrichment of CPX targets (Genetic and chemical perturbations)

| NAME                                            | NES       | NOM p-val | FDR q-val   |
|-------------------------------------------------|-----------|-----------|-------------|
| SCHUHMACHER_MYC_TARGETS_UP                      | 2.1       | 0         | 0.001       |
| JYANG_MYCN                                      | 2.0602424 | 0         | 0.001740632 |
| MORI_EMU_MYC_LYMPHOMA_BY_ONSET_TIME_UP          | 1.9022601 | 0         | 0.009949825 |
| MENSSSEN_MYC_TARGETS                            | 1.8271015 | 0         | 0.020422729 |
| SANSOM_APC_TARGETS_REQUIRE_MYC                  | 1.826927  | 0         | 0.019973619 |
| TARTE_PLASMA_CELL_VS_PLASMABLAST_DN             | 1.7787449 | 0         | 0.028089175 |
| SCHLOSSER_MYC_TARGETS_REPRESSED_BY_SERUM        | 1.7770976 | 0         | 0.028022494 |
| KIM_MYC_AMPLIFICATION_TARGETS_UP                | 1.6246115 | 0         | 0.077343486 |
| DANG_MYC_TARGETS_UP                             | 1.6043347 | 0         | 0.0859786   |
| SCHLOSSER_MYC_TARGETS_AND_SERUM_RESPONSE_DN     | 1.707464  | 0.0019724 | 0.04636353  |
| DANG_REGULATED_BY_MYC_UP                        | 1.5659686 | 0.0019763 | 0.10390965  |
| SCHLOSSER_MYC_TARGETS_AND_SERUM_RESPONSE_UP     | 1.709521  | 0.0041929 | 0.045992367 |
| ACOSTA_PROLIFERATION_INDEPENDENT_MYC_TARGETS_UP | 1.6639152 | 0.0056711 | 0.063507766 |
| SCHLOSSER_MYC_AND_SERUM_RESPONSE_SYNERGY        | 1.7851715 | 0.0084211 | 0.026890123 |
| BILD_MYC_ONCOGENIC_SIGNATURE                    | 1.3102815 | 0.0293542 | 0.3030681   |
| KIM_MYCL1_AMPLIFICATION_TARGETS_DN              | 1.4097298 | 0.0658436 | 0.2076127   |

**B**

GSEA for enrichment of CPX targets (Oncogenic signatures)

| NAME                   | NES       | NOM p-val   | FDR q-val   |
|------------------------|-----------|-------------|-------------|
| MYC_UP.V1_UP           | 2.0591497 | 0           | 0           |
| EIF4E_UP               | 1.6493754 | 0.004056795 | 0.02482508  |
| CSR_LATE_UP.V1_UP      | 1.6395335 | 0           | 0.018402291 |
| RPS14_DN.V1_DN         | 1.6152741 | 0           | 0.017571498 |
| GCNP_SHH_UP_LATE.V1_UP | 1.4219851 | 0.004210526 | 0.10633502  |
| STK33_NOMO_DN          | 1.3973626 | 0           | 0.11529338  |
| STK33_DN               | 1.3874437 | 0.001976285 | 0.10959221  |
| BMI1_DN.V1_DN          | 1.3646958 | 0.030181086 | 0.122080706 |
| RB_P107_DN.V1_UP       | 1.3415922 | 0.029350106 | 0.13575825  |

**C**

GSEA for enrichment of CPX targets (Transcription factor binding motif)

| NAME                     | NES  | NOM p-val | FDR q-val |
|--------------------------|------|-----------|-----------|
| V\$MYC_MAX_01            | 1.74 | 0         | 0.056     |
| TMTCGCGANR_UNKNOWN       | 1.57 | 0         | 0.253     |
| GKCGCNNNNNNTGAYG_UNKNOWN | 1.46 | 0         | 0.478     |
| V\$USF_C                 | 1.45 | 0         | 0.429     |
| V\$USF_Q6_01             | 1.41 | 0         | 0.477     |
| V\$NFMUE1_Q6             | 1.39 | 0.022     | 0.513     |
| V\$ZF5_B                 | 1.39 | 0         | 0.441     |
| V\$USF_Q6                | 1.3  | 0.019     | 0.841     |
| V\$MYC_MAX_B             | 1.3  | 0.042     | 0.81      |

**D**

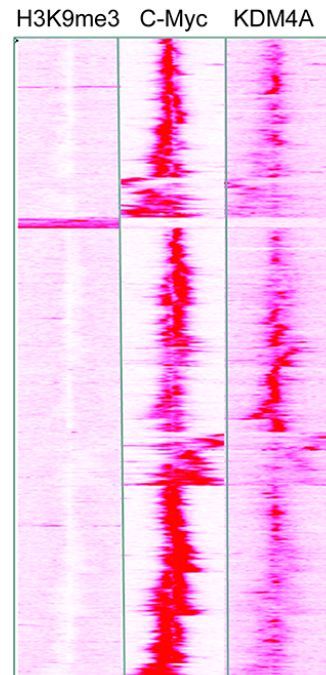

**Figure S4. CPX targets the Myc pathway**

(A) Gene set (from genetic and chemical perturbations) representing Myc pathways or signatures that are enriched with CPX targets, as analyzed by GSEA. NES = Normalized enrichment score. NOM = normalized. FDR = false discovery rate. (B) Gene set (oncogenic signatures) enrichment analysis for CPX targets. (C) Gene set (transcription factor binding motif signatures) enrichment analysis for CPX targets. (D) Heat map analysis of occupancy peaks of H3K9me3, c-Myc and KDM4A in human embryonic stem cells (ENCODE data).

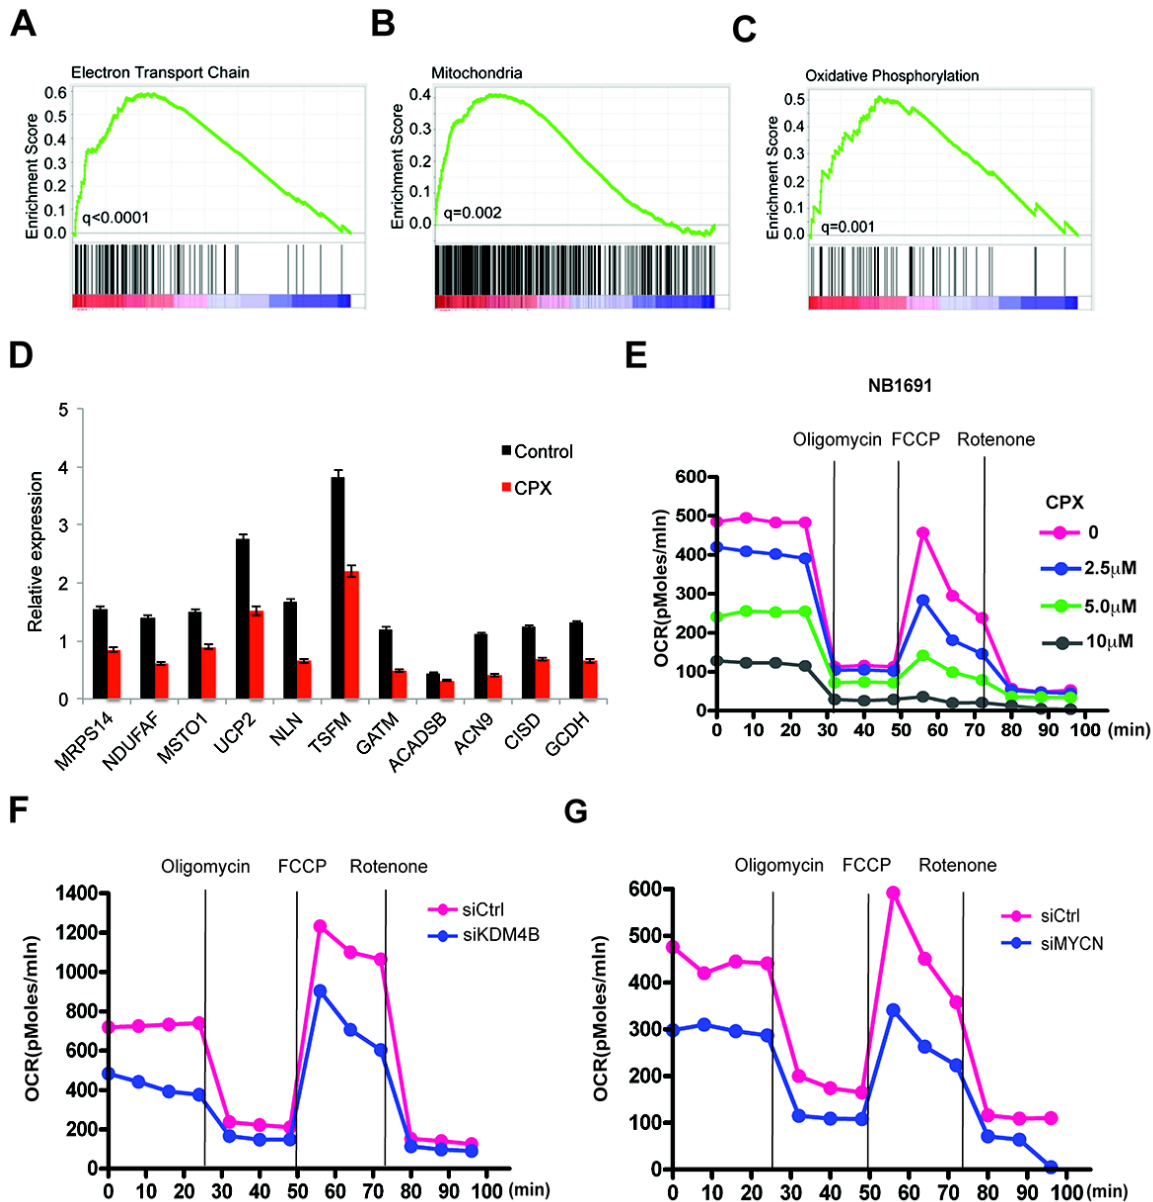

**Figure S5. CPX inhibits oxidative phosphorylation**

(A-C) GSEA analysis of our microarray data reveals that CPX suppresses genes involved in oxidative phosphorylation or electron transport chain reaction. (D) After treating NB-1691 cells for 48h with 2.5  $\mu$ M CPX, RT-PCR was used to validate the genes involved in mitochondria respiration. (E) Oxygen consumption analysis showing consumption was compromised by CPX treatment of NB-1691 cells for 48 hours. (F) Oxygen consumption was compromised by depletion



of KDM4B in NB-1691 cells. (G) Oxygen consumption was also compromised by depletion of MYCN in NB-1691 cells.

**A**

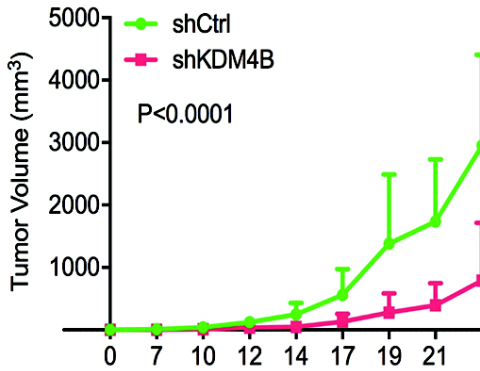

**B**

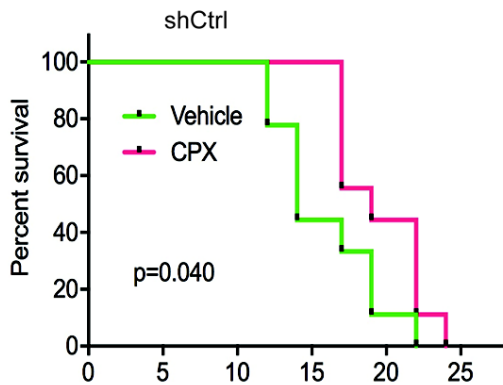

**C**

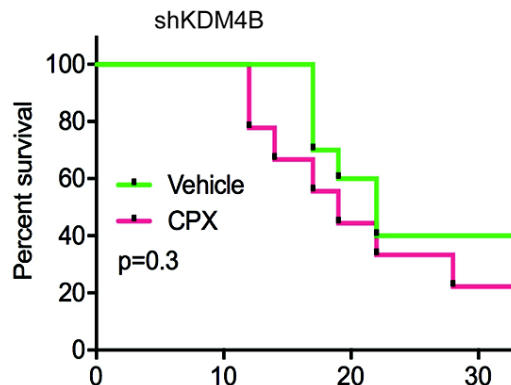

**Figure S6. CPX effect on BE2C xenografts with KDM4B knockdown**

(A) Growth of BE2(C) subcutaneous xenografts, shRNA control (n=5/group) and KDM4B knockdown (n=5/group). P value was computed by Student's t test.

(B-C) shRNA-ctrl and shKDM4B tumor bearing mice were treated with vehicle or 20 mg/kg of CPX twice daily via oral gavage. Kaplan-Meier analysis of survival curve with the Wilcoxon test

being used to determine the P value for shRNA control (n=5/group) (**B**) or shKDM4B-814 group (n=5/group) (**C**).

**Table S1. The sequences of the focused KDM siRNA library**



|         |     |             |             |           |        |              |           |                      |
|---------|-----|-------------|-------------|-----------|--------|--------------|-----------|----------------------|
| Plate 1 | C05 | M-022873-01 | D-022873-01 | JMJD8     | 339123 | NM_001005920 | 56090145  | CGUAAGCGCUGGUUCCUUU  |
| Plate 1 | C05 | M-022873-01 | D-022873-02 | JMJD8     | 339123 | NM_001005920 | 56090145  | CGAGUGGGCCUCUCUCUUU  |
| Plate 1 | C05 | M-022873-01 | D-022873-04 | JMJD8     | 339123 | NM_001005920 | 56090145  | GGUACUCAGAAUGUAUCUA  |
| Plate 1 | C05 | M-022873-01 | D-022873-17 | JMJD8     | 339123 | NM_001005920 | 56090145  | CCAGUAAAGCUCUUGAAUA  |
| Plate 1 | C06 | M-025357-01 | D-025357-02 | JHDM1D    | 80853  | NM_030647    | 90093354  | GCACAGACUAGACACACA   |
| Plate 1 | C06 | M-025357-01 | D-025357-03 | JHDM1D    | 80853  | NM_030647    | 90093354  | GAUACCAUGUCAAACUGA   |
| Plate 1 | C06 | M-025357-01 | D-025357-04 | JHDM1D    | 80853  | NM_030647    | 90093354  | GGAAACUUCGAGAUCAUA   |
| Plate 1 | C06 | M-025357-01 | D-025357-17 | JHDM1D    | 80853  | NM_030647    | 90093354  | CUAAUAAACACCCGUGUAA  |
| Plate 1 | C07 | M-009223-01 | D-009223-01 | KDM1A     | 23028  | NM_015013    | 58761545  | UGAAUUAGCUGAAACACAA  |
| Plate 1 | C07 | M-009223-01 | D-009223-02 | KDM1A     | 23028  | NM_015013    | 58761545  | GACAAGCUGUUCUAAAGA   |
| Plate 1 | C07 | M-009223-01 | D-009223-03 | KDM1A     | 23028  | NM_015013    | 58761545  | GUAAAGCCACCCAGAGUA   |
| Plate 1 | C07 | M-009223-01 | D-009223-04 | KDM1A     | 23028  | NM_015013    | 58761545  | CUAAUAAAGCUCAAUACUG  |
| Plate 1 | C08 | M-008121-01 | D-008121-01 | KDM1B     | 221656 | NM_153042    | 116256450 | CUGCAUAACUUUGGAAUUA  |
| Plate 1 | C08 | M-008121-01 | D-008121-02 | KDM1B     | 221656 | NM_153042    | 116256450 | GGACCACAAUAAUUCUUU   |
| Plate 1 | C08 | M-008121-01 | D-008121-04 | KDM1B     | 221656 | NM_153042    | 116256450 | UAACAACCCAGUAGCAUUA  |
| Plate 1 | C08 | M-008121-01 | D-008121-17 | KDM1B     | 221656 | NM_153042    | 116256450 | GGUCAGUUUAAUACAGUA   |
| Plate 1 | C09 | M-016031-01 | D-016031-01 | MINA      | 84864  | NM_153182    | 110227620 | GUACAUAAUCUCCCGCAGGA |
| Plate 1 | C09 | M-016031-01 | D-016031-02 | MINA      | 84864  | NM_153182    | 110227620 | GUAAGCAGAUAGAUUAGA   |
| Plate 1 | C09 | M-016031-01 | D-016031-03 | MINA      | 84864  | NM_153182    | 110227620 | GGGCAACGUAUUCAGUUUCA |
| Plate 1 | C09 | M-016031-01 | D-016031-17 | MINA      | 84864  | NM_153182    | 110227620 | UCACAGUACUCCGGAUCA   |
| Plate 1 | C10 | M-014397-01 | D-014397-01 | C14orf169 | 79697  | NM_024644    | 106879205 | GCGAAGAACCGCUUUC AUG |
| Plate 1 | C10 | M-014397-01 | D-014397-02 | C14orf169 | 79697  | NM_024644    | 106879205 | CCCGAGACUUAUGGAUUA   |
| Plate 1 | C10 | M-014397-01 | D-014397-03 | C14orf169 | 79697  | NM_024644    | 106879205 | GUGCACCGCCCAACAUUA   |
| Plate 1 | C10 | M-014397-01 | D-014397-04 | C14orf169 | 79697  | NM_024644    | 106879205 | GACCAGUCUCCUUGGC AA  |
| Plate 1 | C11 | M-012912-01 | D-012912-01 | PHF2      | 5253   | NM_005392    | 117190341 | GCAAGCCUGACGUCGAAG   |
| Plate 1 | C11 | M-012912-01 | D-012912-02 | PHF2      | 5253   | NM_005392    | 117190341 | AGGAGUUUGGACUUAUA    |
| Plate 1 | C11 | M-012912-01 | D-012912-03 | PHF2      | 5253   | NM_005392    | 117190341 | ACGGGAAACUACUCCUUUA  |
| Plate 1 | C11 | M-012912-01 | D-012912-04 | PHF2      | 5253   | NM_005392    | 117190341 | GCGCCGACAUCCACAUUA   |
| Plate 1 | D02 | M-004291-00 | D-004291-01 | PHF8      | 23133  | NM_015107    | 32698699  | GAACCAAGAUAGCAAAGAA  |
| Plate 1 | D02 | M-004291-00 | D-004291-02 | PHF8      | 23133  | NM_015107    | 32698699  | CAGCAGACCUUUCAGAUU   |
| Plate 1 | D02 | M-004291-00 | D-004291-03 | PHF8      | 23133  | NM_015107    | 32698699  | GGAGGGAACUUCUACACA   |
| Plate 1 | D02 | M-004291-00 | D-004291-04 | PHF8      | 23133  | NM_015107    | 32698699  | GGACAUUUUCCGCGUUUUG  |
| Plate 1 | D03 | M-016468-01 | D-016468-01 | TYW5      | 129450 | NM_001039693 | 89242133  | GGUGAUGUAUUUAUUCUUC  |
| Plate 1 | D03 | M-016468-01 | D-016468-02 | TYW5      | 129450 | NM_001039693 | 89242133  | GGACUUCUAUACACACGUA  |
| Plate 1 | D03 | M-016468-01 | D-016468-03 | TYW5      | 129450 | NM_001039693 | 89242133  | CGAGAUCCAGUAUUUAUUA  |
| Plate 1 | D03 | M-016468-01 | D-016468-04 | TYW5      | 129450 | NM_001039693 | 89242133  | CCGAGUUAUACAGAGGAUA  |
| Plate 1 | D04 | M-014140-01 | D-014140-01 | KDM6A     | 7403   | NM_021140    | 10863942  | GAACAGUCCCGCCAAUA    |
| Plate 1 | D04 | M-014140-01 | D-014140-02 | KDM6A     | 7403   | NM_021140    | 10863942  | GAGAGUAAUUCACGAAAGA  |
| Plate 1 | D04 | M-014140-01 | D-014140-04 | KDM6A     | 7403   | NM_021140    | 10863942  | CAGCACGAAUUAAGUAUUU  |
| Plate 1 | D04 | M-014140-01 | D-014140-05 | KDM6A     | 7403   | NM_021140    | 10863942  | GCUAAUUGGCUUGGCAACA  |
| Plate 1 | D05 | M-017344-00 | D-017344-01 | UTY       | 7404   | NM_007125    | 33188430  | GCAAAUAGACACAAAGAA   |
| Plate 1 | D05 | M-017344-00 | D-017344-02 | UTY       | 7404   | NM_007125    | 33188430  | GCUAGGCAGUAUUUGUAUA  |
| Plate 1 | D05 | M-017344-00 | D-017344-03 | UTY       | 7404   | NM_007125    | 33188430  | CCAUGGAGAUUACCAAAUA  |
| Plate 1 | D05 | M-017344-00 | D-017344-04 | UTY       | 7404   | NM_007125    | 33188430  | CAACUAGCACUGGUUAUUA  |

**Table S2. Primers for Real time PCR**

| <b>Primer Sequence</b>     | <b>Gene Symbol</b> | <b>Forward or reverse</b> |
|----------------------------|--------------------|---------------------------|
| AACCCGTTGAACCCATT          | 18S                | F                         |
| CCATCCAATCGGTAGTAGCG       | 18S                | R                         |
| TGGCAAAGACTATTTGATTTTCA    | ACADSB             | F                         |
| GCAGCATTGTATGTTAGTAATCTTGC | ACADSB             | R                         |
| AGGCACAGCGTTTCTTGC         | ACN9               | F                         |
| TTTGTTTCATCACGAAAGTCATTAAG | ACN9               | R                         |
| CCAACCGCGAGAAGATGA         | ACTIN              | F                         |
| CCAGAGGCGTACAGGGATAG       | ACTIN              | R                         |
| GCCCACTATGCCCACTCTC        | ANGPTL2            | F                         |
| CTGCAGGCAGTCTCTCCAT        | ANGPTL2            | R                         |
| GAAGAAGAGGTGCCTGAGGA       | ARID4A             | F                         |
| CAGGTGGTTTGTGATTGGA        | ARID4A             | R                         |
| TCTGAGCCCGAACTGGAG         | BOP1               | F                         |
| TGCTGTGGCTGAGAGGAGA        | BOP1               | R                         |
| GCGAGCAGAGGCTTAAGGT        | BTG2               | F                         |
| GGGAAACCAGTGGTGTGTTGTA     | BTG2               | R                         |
| GAAGACCCCATCAAGGTG         | CISD3              | F                         |
| AAGAAGTGGGAGCCGTCAC        | CISD3              | R                         |
| TCAAGAGGTGCCACGTCTCC       | CMYC               | F                         |
| TCTTGGCAGCAGGATAGTCCTT     | CMYC               | R                         |
| TGCTCTTTGCCAACCAGA         | CYB5R3             | F                         |
| TGCAGAATGTTTGTTCCTGAGT     | CYB5R3             | R                         |
| GCCATGGTCAAGGGCTAC         | DHCR7              | F                         |
| TTGTAAAAGAAATTGCCTGTGAA    | DHCR7              | R                         |
| CGGAGCCTTCAGGGAAAG         | DHODH              | F                         |
| CACTCTCCGCAAGCCATC         | DHODH              | R                         |
| CACACTTCTCTCCGCGTACAT      | ELOVL2             | F                         |
| GTTGTAGCCTCCTTCCCAAGT      | ELOVL2             | R                         |
| ACTTTGTCAGGGACTATCCTGTG    | ENO2               | F                         |
| TCCCTACATTGGCTGTGAACT      | ENO2               | R                         |
| TGGCTCAACCTCATCTTCAA       | G6PC3F             | F                         |
| AGAAGAGGGGAAGTGGTGAAC      | G6PC3R             | R                         |
| TTTGCAATATGACTTTGGAGGA     | GADD45A            | F                         |
| CATCCCCACCTTATCCAT         | GADD45A            | R                         |
| GAGGATGCTGCTGCCAAG         | GAP43              | F                         |
| GGCACTTTCCTTAGGTTTGGT      | GAP43              | R                         |
| TTTTCAAGAAAGCAGGATGGA      | GATM               | F                         |
| TGGAAAGCCATTTGGATGA        | GATM               | R                         |

|                             |          |   |
|-----------------------------|----------|---|
| GATGGGGGAGTTGGGTGT          | GCDH     | F |
| CATAGGCCACAGACGAAACC        | GCDH     | R |
| CCGGATACTCACGCCAGA          | GDF15    | F |
| AGAGATACGCAGGTGCAGGT        | GDF15    | R |
| TGGACCTTCGTCAGTTTGG         | GPM6A    | F |
| TCAAGAAATTCTCAGAGACAGTACAAA | GPM6A    | R |
| CCATGGATGTGGTCTACGC         | HIST1H4J | F |
| TAGAAAGGGACGCTCAACCA        | HIST1H4J | R |
| TCCCCTGCCACCAGACTA          | HK2      | F |
| TGGACTTGAATCCCTTGGTC        | HK2      | R |
| CGATTCAATGACCCTTCTGG        | HMMR     | F |
| AGGATACTGGTCCTTTCAATACTTCT  | HMMR     | R |
| CGTGGACCACCTGACCTT          | HPDL     | F |
| GGAACCAGCGCAAAAGTG          | HPDL     | R |
| GAATCCTGAATCGAGCTGAGA       | hRARA    | F |
| GGGCCATGTCCTGTGATG          | hRARA    | R |
| TCACCAGCCACATCTACCAG        | JMJD2B   | F |
| GATGTCCCCACGCTTCAC          | JMJD2B   | R |
| GAGGAATCCTGGAGCACAGA        | KIAA1712 | F |
| GCAAGATAGGTTCACAAATCAGG     | KIAA1712 | R |
| TTCATGTGCAAGTTCGTCAAC       | KISS1R   | F |
| CACACTCATGGCGGTCAG          | KISS1R   | R |
| GACGGAGTACACGGAGCAG         | LASS2    | F |
| CGTTCCCACCAGAAGTAATCA       | LASS2    | R |
| CTCCCGAAGAACCCTCTTTC        | LRP8     | F |
| GCTTAATGCCACTCGCTTG         | LRP8     | R |
| CTACGGCACCTGGTTTGG          | LSS      | F |
| CCTCTGCACAGGCAGTCC          | LSS      | R |
| CCTGTGTTAAGCGGAAAACC        | MAP2     | F |
| AGAGACTTTGTCCTTTGCCTGT      | MAP2     | R |
| GCACATTCCTTTTCACCTCAG       | MAT2A    | F |
| CTGCTGAAGGTGGGCATC          | MAT2A    | R |
| GCGTTACTTAGGCAAAGGTGT       | mENO2    | F |
| ATCCTGCTGTTGATGTGGTCC       | mENO2    | R |
| AGATGGTGTCAAGCCGGAAG        | mGAP43   | F |
| TTTTGGTCGCAGCCTTATGAG       | mGAP43   | R |
| CTCGCTCTATCTCTGCTCGTG       | mNPY     | F |
| GGCTGGATCTCTTGCCATATCT      | mNPY     | R |
| AGACACGCAGACGGGTTG          | mRARA    | F |
| GAGGATGCCACTCCCAGA          | mRARA    | R |
| TTGTGCTTTTAAACCCAAAGC       | MRPL35   | F |
| TATTCAGGGGCCGTAGGATT        | MRPL35   | R |
| CCTCTAAAGTTCTTGGATAAAGCAA   | MRPL40   | F |

|                            |         |   |
|----------------------------|---------|---|
| GCTCTCCTCTCAGTCTCCTCAA     | MRPL40  | R |
| TCACTCAGGAAGAATACCATTTTG   | MRPS14  | F |
| CCGATTTCTGATTCTAACAGGAC    | MRPS14  | R |
| GGCACTCGGAGCTTCTACA        | MRPS28  | F |
| GATGCAAAGGATTCCACATTTT     | MRPS28  | R |
| GTCCACCGGGTATGGTTCT        | MSTO1   | F |
| AACACTGGGATGCTCTCCAC       | MSTO1   | R |
| CCAAGGTTCAATTGGACGGC       | mTH     | F |
| GGGCATCCTCGATGAGACTC       | mTH     | R |
| CCACAAGGCCCTCAGTACC        | MYCN    | F |
| CCTCTTCATCATCTTCATCATCTG   | MYCN    | R |
| AGGACATCACCGAAGACAGC       | NDUFAF3 | F |
| CCCACCACCACGATCTCTAT       | NDUFAF3 | R |
| TCTCAGCGCTCCCATGAT         | NLN     | F |
| AATCCTGGAACCACCAACTCT      | NLN     | R |
| TCCTAGCTGAATGCTATAACCTCTG  | NTRK2   | F |
| GGCATCCTTCAGGGTCTTC        | NTRK2   | R |
| CACTTCGGCTGCAGAGTTTT       | PLOR3G  | F |
| AGTGGGCAAATTCTGAAAGG       | PLOR3G  | R |
| CCGATCACTTCTTTTCTTGAT      | QTRTD1  | F |
| CCACCTTCAATCACTCCAATG      | QTRTD1  | R |
| AATTGTGCGGAAATATCTAGTATCAG | RAB3IP  | F |
| CCAGCTGTGACTCCAGAGGT       | RAB3IP  | R |
| GAATGCAGGAAAGAGATCGAA      | RANBP1  | F |
| TCTCCTCAGCATCCTCCTTG       | RANBP1  | R |
| AGTAGGTGCTTGGCGGTTT        | RFC3    | F |
| CACAGTAGATAACACGTGGCAA     | RFC3    | R |
| TTTTTCCTTGTGGTGTGAGTGT     | RPL27A  | F |
| CCCAATGCACACAGGATGTA       | RPL27A  | R |
| CTGTCTCAAGGGGTGATTGC       | SKP2    | F |
| TTCGATAGGTCCATGTGCTG       | SKP2    | R |
| CATGAGTCTCCGGAAGCAG        | SQLE    | F |
| ACAACACCTTCAATAAACTTTGCAT  | SQLE    | R |
| ACTATAGCAAACCTCACGGGAAGA   | ST18    | F |
| GAGAGCTCACTGGGTCTTTCTCT    | ST18    | R |
| AAGCCTCAGCAGTTCTTTGG       | TAC1    | F |
| TCTGGCCATGTCCATAAAGAG      | TAC1    | R |
| TGCACAGGAGCCAAGAGTGAA      | TBP     | F |
| TGCAGACCCTGGACCAACTGTA     | TBP     | R |
| ACTACTACGCCAAGGAGGTAC      | TGFB1   | F |
| TGCTTGAACCTTGTCATAGATTTTCG | TGFB1   | R |
| GCCAAGGACAAGCTCAGG         | TH      | F |
| AGCGTGTACGGGTCTGAACT       | TH      | R |

|                            |       |   |
|----------------------------|-------|---|
| CCGGACTCAGCTGCAAAC         | TRIL4 | F |
| TTGCATTTCTGTATAAACTGTTTCTC | TRIL4 | R |
| GCTCACTCAAGGATCAGTTGG      | TSFM  | F |
| CCATGCAGCTCGTTTAAGAA       | TSFM  | R |
| GACGTGGATGAAGAATAGCTCTG    | TSHZ2 | F |
| CGAAGAAGGGTTCAGTGTGAG      | TSHZ2 | R |
| CCAGATCCCCGTGTATGACT       | UCK2  | F |
| ACGTCTGCGGGATAGACAGT       | UCK2  | R |
| TGAAAGCCAACCTCATGACA       | UCP2  | F |
| CGATGACAGTGGTGCAGAA        | UCP2  | R |

| ChIP PCR Primer Sequence | Gene symbol | F/R |
|--------------------------|-------------|-----|
| AGCCACGAGGTCTTGATTG      | MIR17HG     | F   |
| AGCAATCACCGACTCCACT      | MIR17HG     | R   |

## Materials and Methods

### The individual siRNA target sequences from the pool for validation

KDM2B-01 (5' G.C.A.A.U.A.A.G.G.U.C.A.C.U.G.A.U.C.A.U.U 3'),

KDM5C-01 (5' G.A.G.C.G.G.A.G.G.U.U.U.C.C.U.A.A.U.A.U.U 3')

KDM2B-02 (5' G.A.C.C.U.C.A.G.C.U.G.G.A.C.C.A.A.U.A.U.U 3')

KDM5C-02 (5' G.U.G.G.A.C.A.A.C.U.U.C.A.G.G.U.U.U.A.U.U 3')

KDM4B-01 (5' G.G.A.A.G.A.A.C.C.U.C.A.C.C.U.U.U.G.U.U.U 3')

KDM4B-05 (5' G.G.G.A.A.U.U.C.A.U.G.A.U.C.A.C.A.U.U.U.U 3')

KDM4D-01 (5' G.G.A.A.G.A.A.C.C.G.C.A.U.C.U.A.U.A.A.U.U 3')

KDM4D-02 (5' A.G.A.G.A.G.A.C.C.U.A.U.G.A.U.A.A.U.A.U.U 3')

KDM4E-01 (5' C.U.G.G.A.G.A.G.A.U.G.A.U.A.U.A.G.U.A.U.U 3')

KDM4E-03 (5' C.U.A.G.U.A.A.U.C.U.C.C.C.U.G.A.U.G.U.U.U 3')



KDM6B-01 (5' G.G.A.A.U.G.A.G.G.U.G.A.A.G.A.A.C.G.U.U.U 3')

KDM6B-02 (5' G.G.A.G.A.C.C.U.C.G.U.G.U.G.G.A.U.U.A.U.U 3')

JMJD6-01 (5' G.A.A.C.U.G.G.G.A.U.U.C.A.C.A.U.C.G.A.U.U 3')

JMJD6-02 (5' G.G.A.U.A.A.C.G.A.U.G.G.C.U.A.C.U.C.A.U.U 3')

C14ORF169-01 (5' G.C.G.A.A.G.A.A.C.C.G.C.U.U.U.C.A.U.G.U.U 3')

C14ORF169-02 (5' C.C.C.G.A.G.A.C.U.U.C.A.U.G.G.A.U.U.A.U.U 3')

PHF2-01 (5' G.C.A.A.G.C.G.C.C.U.G.A.C.G.U.C.A.A.G.U.U 3')

PHF2-02 (5' A.G.G.A.G.U.U.U.G.U.G.G.A.C.U.A.U.U.A.U.U 3')

*MYCN* knockdown target sequences (purchased from Origene) were as follows:

siMYCN#1,      ACGCUGAUACAUAACUAAAUUUGAA;      siMYCN#2,      5-  
AGUUCAUACCUAAGUACUGUAAUAA-3.

### **High Content Method for H3K9me3 quantification**

1000 U2OS-KDM4B expressing cells in 25 µl of media were plated into each well of a poly-D-lysine coated Perkin Elmer 384-well View plates (Perkin Elmer 6007710) with a Thermo Scientific Wellmate. The cells were then grown for 18 hours overnight before they were drugged using a VP scientific pintool with S100 pins. The cells were then treated with compound for a twenty-four hours. Following treatment, the cells were fixed with 4% formaldehyde for 20 minutes at 37°C and permeabilized with 0.1% Triton-X 100 for 15 minutes at 25°C. Fixative was removed and each well washed with PBS. Cells were blocked using 1% BSA in PBS for 1 hour at 25°C. The primary antibody against trimethyl-histone H3 at Lys9 (Millipore 07-442) was used at 1/400 dilution in 1% BSA in

PBS. This mixture was added to each well before incubation overnight at 4°C. Each well was then washed 3 times with PBS using a Biotek plate washer, and incubated for 1 hour at 25°C with a solution containing 1/400 goat  $\alpha$ -rabbit-Alexa-488 (Cell Signaling 4412S) and 1  $\mu$ M Hoechst 34580 to detect nuclear material (H21486 Molecular Probes.) Two images were captured of each well at 10X using a GE Healthcare InCell 6000 at 405 to detect nuclear staining and 488 nm to detect H3K9me3. The number of nuclear objects in each well, as detected through Hoechst staining, was compared to the number of cells in each well expressing a minimum amount of H3K9me3 as determined by Alexa-488 fluorescence (1.5 million counts total intensity), to identify the percentage of cells in each considered “H3K9me3 Positive.” Averages shown are the result of eight replicate measurements per data point.

### **Western Blotting**

Antibodies H3K9me2 (4658), H3K9me1 (9538), H3K4me3 (9751), H3K4me2 (9725), H3K27me3 (9733), H3K27me2 (9728), H3K36me3 (9763), H3K36me2 (2901), H3K79me3 (4260), H3K79me2 (5427), Histone H3 (9715) were purchased from Cell Signaling. H3K9me3 (07-523), H3K9me2 (07-441), H3K9me1 (107-450), Phosphorylated H2AX (05-636), Acetyl H3 (06-599) were purchased from Millipore. KDM4B (A301-478A), KDM4C (A300-885A), KDM6A (A302-374A), KDM5A (A300-897A) and PHF8 (A301-772A) were purchased from Bethyl Laboratories.  $\beta$ -actin (A1978) antibody was purchased from Sigma. Anti-HA (3F10) antibody was purchased from Roche.

## **ENCODE data analysis**

BigWig files for ChIP-seq data of H3K9me3, Myc and KDM4A from human embryonic stem cells were downloaded from UCSC/ENCODE. Coverage at TSS +/- 2500bp of RefSeq genes was generated in 100 bins for each mark and the combined data were clustered using R.
